# Supplementary material
Source: ML conference proceedings conference paper supplement (https://proceedings.neurips.cc/paper_files/paper/2020/hash/0e230b1a582d76526b7ad7fc62ae937d-Abstract.html)
Supplement: Supplementary file [file 0e230b1a582d76526b7ad7fc62ae937d-Supplemental.pdf]

---

# Appendix for “FleXOR: Trainable Fractional Quantization”

---

## A Example of a XOR-gate Network Structure Representation

In Figure 2, outputs of an XOR-gate network are given as

$$\begin{aligned}
 y_1 &= x_1 \oplus x_3 \oplus x_4 \\
 y_2 &= x_1 \oplus x_2 \\
 y_3 &= x_1 \oplus x_2 \oplus x_3 \\
 y_4 &= x_3 \oplus x_4 \\
 y_5 &= x_2 \oplus x_4 \\
 y_6 &= x_2 \oplus x_3 \oplus x_4.
 \end{aligned}$$

Equivalently, the same structure as above can be represented in a matrix as

$$\mathbf{M}^\oplus = \begin{bmatrix} 1 & 0 & 1 & 1 \\ 1 & 1 & 0 & 0 \\ 1 & 1 & 1 & 0 \\ 0 & 0 & 1 & 1 \\ 0 & 1 & 0 & 1 \\ 0 & 1 & 1 & 1 \end{bmatrix}. \tag{1}$$

Note that elements of  $\mathbf{M}^\oplus$  are matched with coefficients of  $y_i (1 \leq i \leq 6)$ . For two vectors  $\mathbf{y} = \{y_1, y_2, y_3, y_4, y_5, y_6\}$  and  $\mathbf{x} = \{x_1, x_2, x_3, x_4\}$ , the following equation holds:

$$\mathbf{y} = \mathbf{M}^\oplus \cdot \mathbf{x}, \tag{2}$$

where element-wise addition and multiplication are performed by ‘XOR’ and ‘AND’ function, respectively. In Eq. (1),  $N_{tap}$  (i.e., the number of ‘1’s in a row) is 2 or 3.

## B Supplementary Data for Basic FleXOR Training Principles

A Boolean XOR gate can be modeled as  $\mathcal{F}^\oplus(x_1, x_2) = (-1) \text{sign}(x_1) \text{sign}(x_2)$  if 0 is replaced with  $-1$  as shown in Table 1.

| $\text{sign}(x_1)$ | $\text{sign}(x_2)$ | $\mathcal{F}^\oplus(x_1, x_2)$ |
|--------------------|--------------------|--------------------------------|
| -1                 | -1                 | -1                             |
| -1                 | +1                 | +1                             |
| +1                 | -1                 | +1                             |
| +1                 | +1                 | -1                             |

Table 1: An XOR gate modeling using  $\mathcal{F}^\oplus(x_1, x_2)$ .

In Eq. (1), forward propagation for  $y_3$  is expressed as

$$y_3 = \mathcal{F}^\oplus(x_1, x_2, x_3) = (-1)^2 \text{sign}(x_1) \text{sign}(x_2) \text{sign}(x_3). \tag{3}$$

while partial derivative of  $y_3$  with respect to  $x_1$  is given as (not derived from Eq. (3))

$$\frac{\partial y_3}{\partial x_1} = S_{\tanh}(-1)^2(1 - \tanh^2(x_1 \cdot S_{\tanh})) \tanh(x_2 \cdot S_{\tanh}) \tanh(x_3 \cdot S_{\tanh}), \quad (4)$$

or as

$$\frac{\partial y_3}{\partial x_1} \approx S_{\tanh}(-1)^2(1 - \tanh^2(x_1 \cdot S_{\tanh})) \text{sign}(x_2) \text{sign}(x_3). \quad (5)$$

We choose Eq. (5), instead of Eq. (4), as explained in Section 3.

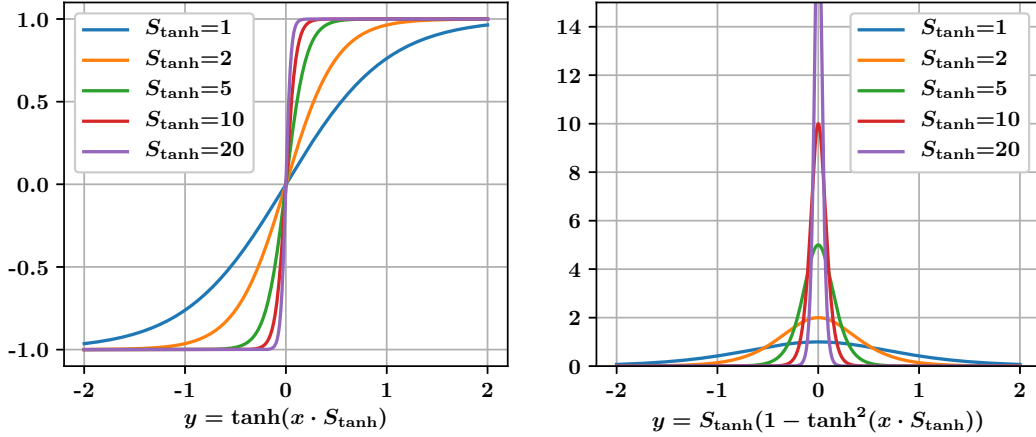

Figure 1: The left graph shows hyperbolic tangent ( $y = \tanh(x \cdot S_{\tanh})$ ) graphs with various scaling factors ( $S_{\tanh}$ ). The right graph shows their derivatives. These graphs support the arguments of ‘Optimize  $S_{\tanh}$ ’ in Section 4.

As shown in Figure 1, large  $S_{\tanh}$  yields sharp transitions for near-zero inputs. Such a sharp approximation of the Heaviside step function produces large gradient values for small inputs and encourages encrypted weights to be separated into negative or positive values. Too large  $S_{\tanh}$ , however, has the same issues of a too-large learning rate.

Figure 4 presents training loss and test accuracy when  $N_{tap}=2$  and  $N_{out}$  is 10 or 20. Compared with Figure 5,  $N_{tap}=2$  presents improved accuracy for the cases of high compression configurations (e.g.,  $N_{in}=4$  and  $N_{out}=10$ ). We use  $N_{tap} = 2$  for CIFAR-10 and ImageNet, since low  $N_{tap}$  avoids gradient vanishing problems or high approximation errors in Eq.(5) or Eq.(6).

Figure 5 plots the distribution of encrypted weights at different training steps when each row of  $M^{\oplus}$  is randomly assigned with  $\{0, 1\}$  (i.e.,  $N_{tap}$  is  $N_{in}/2$  on average) or assigned with only two 1’s ( $N_{tap}=2$ ). Due to gradient calculations based on tanh and high  $S_{\tanh}$ , encrypted weights tend to be clustered on the left or right (near-zero encrypted weights become less as  $N_{tap}$  increases) even without weight clipping.

## C Supplementary Experimental Results of CIFAR-10 and ImageNet

In this section, we additionally provide various graphs and accuracy tables for ResNet models on CIFAR10 and ImageNet. We also present experimental results from wider hyper-parameters searches including  $q=2$  with two separate  $M^{\oplus}$  configurations (with the same  $N_{in}$  and  $N_{out}$  for two  $M^{\oplus}$  matrices).

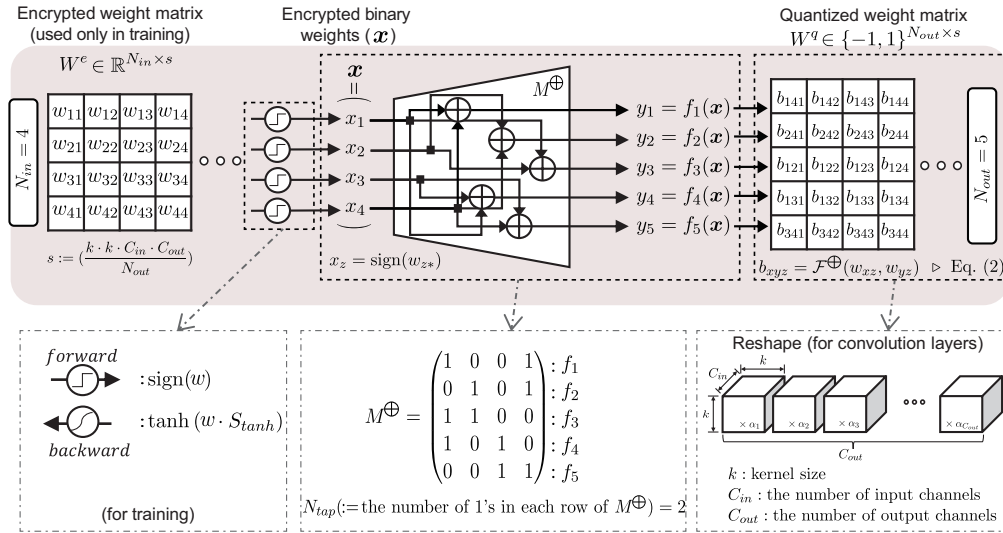

Figure 2: An example showing FleXOR operations for training. XOR gates are described in different ways for forward- and backward propagation. Once we obtain encrypted binary weights after training, we use digital XOR gates for inference.

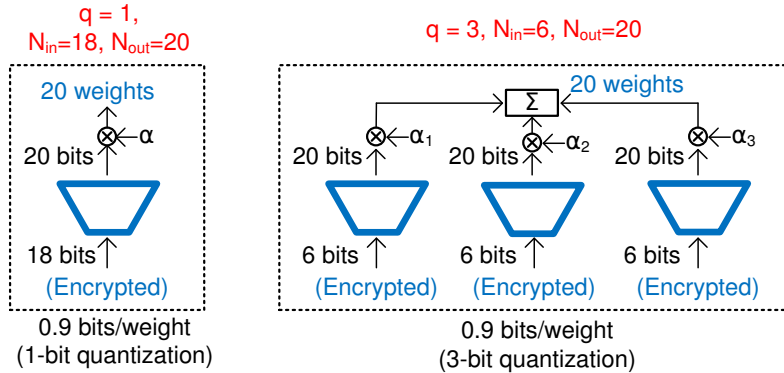

Figure 3: Using the same weight storage footprint, FleXOR enables various internal quantization schemes. (Left): 1-bit internal quantization. (Right): 3-bit internal quantization with 3 different  $M^\oplus$  configurations.

|                         | Bits/Weight | ResNet-20 |       | ResNet-32 |       | Comp. Ratio |
|-------------------------|-------------|-----------|-------|-----------|-------|-------------|
| FP                      | 32          | 91.87%    | Diff. | 92.33%    | Diff. | 1.0x        |
| $N_{in}=10, N_{out}=10$ | 1.0         | 90.21%    | -1.66 | 91.40%    | -0.93 | 29.95×      |
| $N_{in}=9, N_{out}=10$  | 0.9         | 90.03%    | -1.84 | 91.28%    | -1.05 | 31.82×      |
| $N_{in}=8, N_{out}=10$  | 0.8         | 89.73%    | -2.14 | 90.96%    | -1.37 | 35.32×      |
| $N_{in}=7, N_{out}=10$  | 0.7         | 89.88%    | -1.99 | 90.67%    | -1.66 | 39.68×      |
| $N_{in}=6, N_{out}=10$  | 0.6         | 89.21%    | -2.66 | 90.41%    | -1.92 | 45.27×      |
| $N_{in}=5, N_{out}=10$  | 0.5         | 88.59%    | -3.28 | 89.95%    | -2.38 | 52.70×      |

Table 2: Weight compression comparison of ResNet-20 and ResNet-32 on CIFAR-10 when  $N_{out}=10$ . Parameters and recipes not described in the table are the same as in Table 1. We also present compression ratio for fractional quantized ResNet-32 when one scaling factor ( $\alpha$ ) is assigned to each output channel.

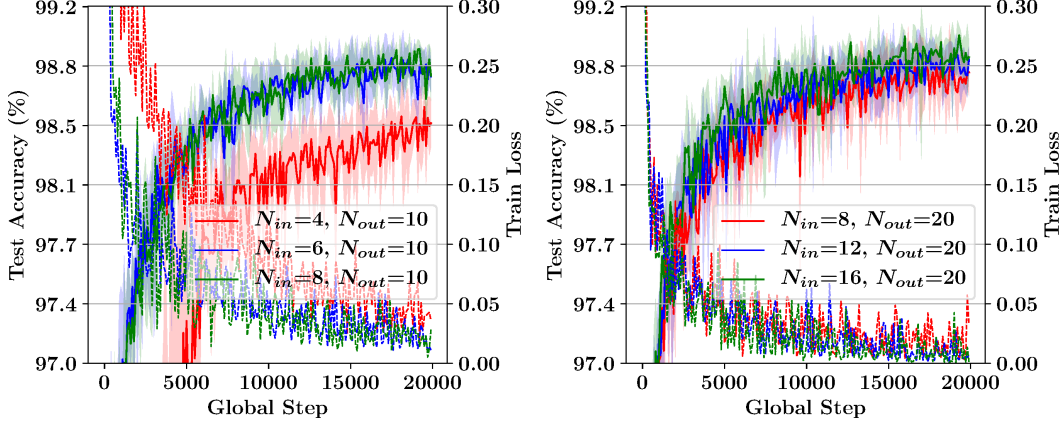

Figure 4: Test accuracy and training loss of LeNet-5 on MNIST when number of ‘1’s in each row of  $M^\oplus$  is fixed to be 2 ( $N_{tap}=2$ ).  $N_{out}$  is 10 or 20 to generate, effectively, 0.4, 0.6, or 0.8 bit/weight quantization. With low  $N_{tap}$  of  $M^\oplus$ , MNIST training presents less variations on training loss and test accuracy that in Figure 5.

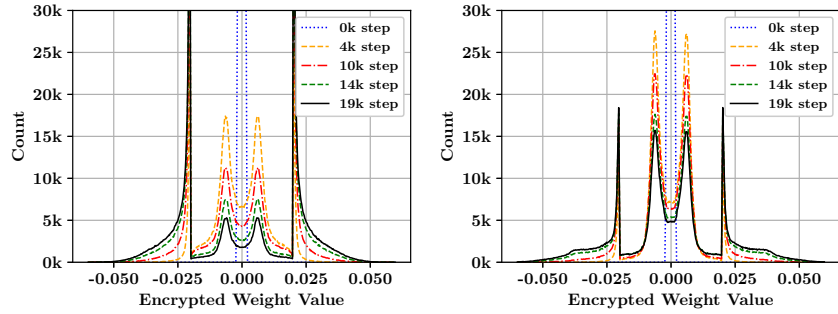

Figure 5: Distribution of encrypted weight values for FC1 layer of LeNet-5 at different training steps using  $S_{tanh}=100$  and  $N_{out}=10$ . (Left):  $M^\oplus$  is randomly filled ( $N_{tap} \approx N_{in}/2$ ). (Right):  $N_{tap} = 2$  for every row of  $M^\oplus$ .

|                                 | ResNet-20 |        |       | ResNet-32 |        |       |
|---------------------------------|-----------|--------|-------|-----------|--------|-------|
|                                 | FP        | Quant. | Diff. | FP        | Quant. | Diff. |
| TWN (ternary)                   | 92.68%    | 88.65% | -4.03 | 93.40%    | 90.94% | -2.46 |
| BinaryRelax (ternary)           | 92.68%    | 90.07% | -1.91 | 93.40%    | 92.04% | -1.36 |
| TTQ (ternary)                   | 91.77%    | 91.13% | -0.64 | 92.33%    | 92.37% | +0.04 |
| LQ-Net (2 bit)                  | 92.10%    | 91.80% | -0.30 | -         | -      | -     |
| FlexOR( $q = 2, N_{out} = 20$ ) |           |        |       |           |        |       |
| $N_{in}=20, 2.0$ bit/weight     |           | 91.38% | -0.49 |           | 92.25% | -0.08 |
| $N_{in}=18, 1.8$ bit/weight     |           | 91.00% | -0.87 |           | 92.27% | -0.06 |
| $N_{in}=16, 1.6$ bit/weight     | 91.87%    | 90.88% | -0.99 | 92.33%    | 92.11% | -0.22 |
| $N_{in}=14, 1.4$ bit/weight     |           | 90.90% | -0.97 |           | 92.02% | -0.31 |
| $N_{in}=12, 1.2$ bit/weight     |           | 90.56% | -1.31 |           | 91.62% | -0.71 |
| FlexOR( $q = 2, N_{out} = 10$ ) |           |        |       |           |        |       |
| $N_{in}=10, 2.0$ bit/weight     |           | 91.19% | -0.68 |           | 92.61% | +0.28 |
| $N_{in}=9, 1.8$ bit/weight      |           | 91.44% | -0.43 |           | 92.09% | -0.24 |
| $N_{in}=8, 1.6$ bit/weight      | 91.87%    | 91.10% | -0.77 | 92.33%    | 92.08% | -0.25 |
| $N_{in}=7, 1.4$ bit/weight      |           | 90.94% | -0.93 |           | 91.74% | -0.59 |
| $N_{in}=6, 1.2$ bit/weight      |           | 90.56% | -1.31 |           | 91.37% | -0.96 |

Table 3: Weight compression comparison of ResNet-20 and ResNet-32 on CIFAR-10 using learning rate warmup (for 100 epochs) and  $q=2$ . As mentioned in Figure 6, multiple  $M^\oplus$  can be combined for multi-bit quantization schemes. Then, the number of scaling factors should be doubled. FlexOR with  $q=2$  and two different  $M^\oplus$  structures achieve full-precision accuracy when both  $N_{in}$  and  $N_{out}$  are 10.

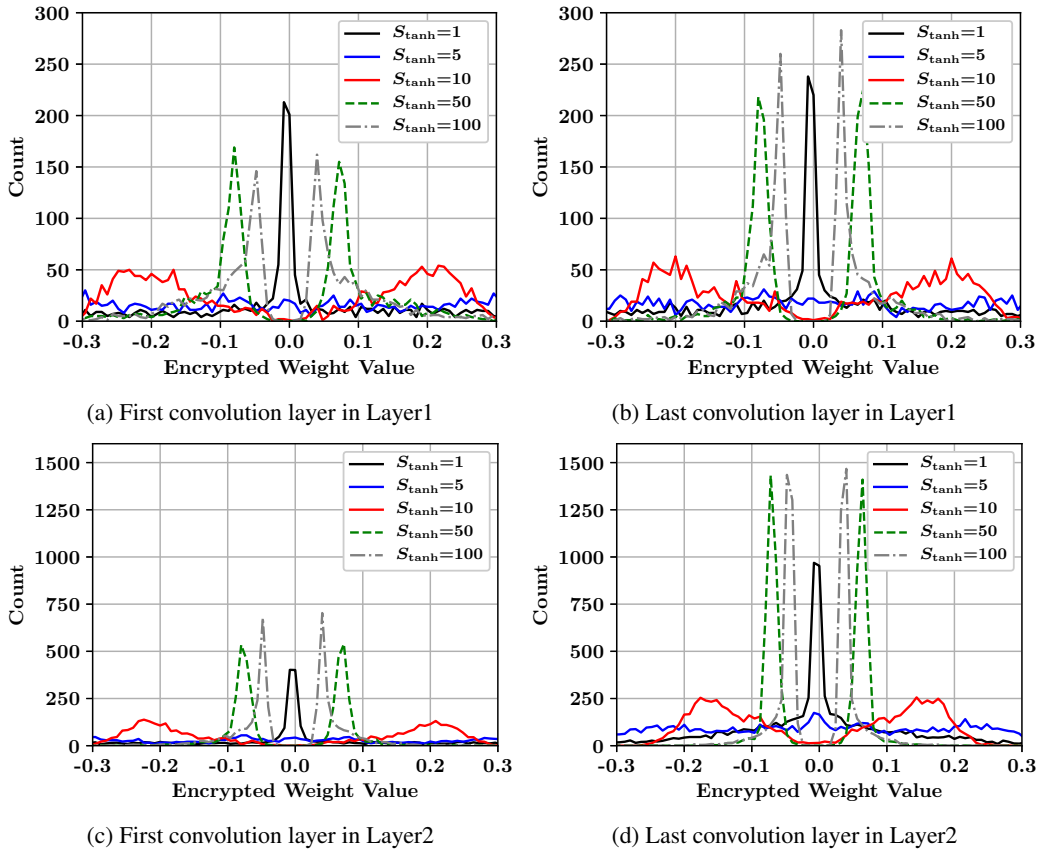

Figure 6: Distributions of encrypted weights (at the end of training) in various layers of ResNet-32 on CIFAR-10 using various  $S_{\tanh}$  and the same  $N_{out}$ ,  $N_{in}$ , and  $q$  as Figure 7. The ResNet-32 network mainly consists of three layers according to the feature map sizes: Layer1, Layer2 and Layer3.

| Methods                         | Bits/Weight            | Top-1 | Top-5 |
|---------------------------------|------------------------|-------|-------|
| Full Precision [1]              | 32                     | 69.6% | 89.2% |
| TWN [3]                         | ternary                | 61.8% | 84.2% |
| ABC-Net [4]                     | 2                      | 63.7% | 85.2% |
| BinaryRelax [5]                 | ternary                | 66.5% | 87.3% |
| TTQ(1.5× Wide) [7]              | ternary                | 66.6% | 87.2% |
| LQ-net [6]                      | 2                      | 68.0% | 88.0% |
| QIL [2]                         | 2                      | 68.1% | 88.3% |
| FleXOR ( $q=2$ , $N_{out}=20$ ) | 1.6 ( $0.8 \times 2$ ) | 66.2% | 86.7% |
|                                 | 1.2 ( $0.6 \times 2$ ) | 65.4% | 86.0% |
|                                 | 0.8 ( $0.4 \times 2$ ) | 63.8% | 85.0% |

Table 4: Weight compression comparison of ResNet-18 on ImageNet when  $q=2$ . Since  $q$  is 2, we also list the other compression schemes which use 2-bit or ternary quantization scheme for model compression.

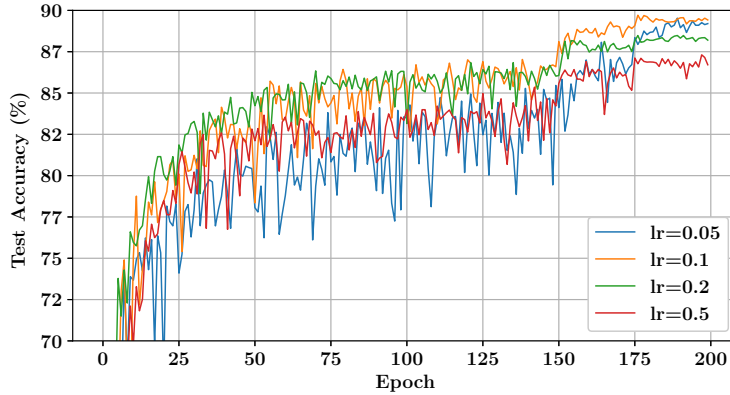

(a) **Initial Learning Rate (0.1):** Test accuracy of ResNet-32 on CIFAR10 using the learning schedule in Figure 7 and various initial learning rates (0.05, 0.1, 0.2, 0.5).

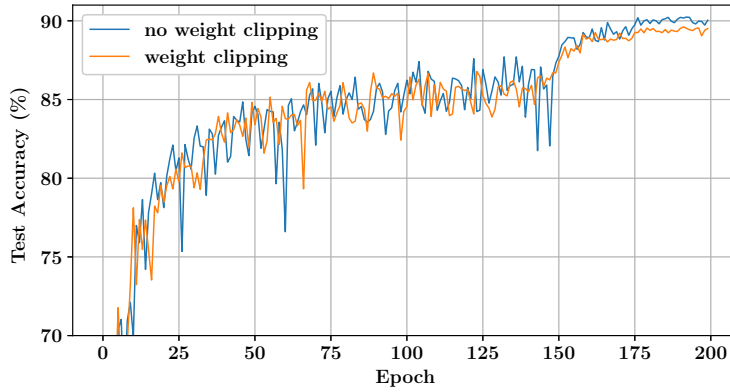

(b) **No Weight Clipping:** Test accuracy of ResNet-32 on CIFAR10 using the learning schedule in Figure 7. As for weight clipping, we restrict the encrypted weights to be ranged as  $(-2.0/S_{\tanh}, +2.0/S_{\tanh})$ . As can be observed, the red line implies that weight clipping is not effective with FleXOR.

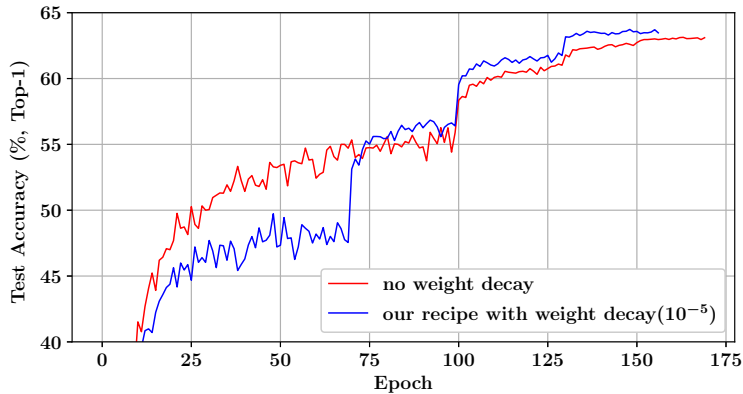

(c) **Weight Decay Factor (10<sup>-5</sup>):** Two graphs depict test accuracy of ResNet-18 on ImageNet with or without weight decay. The learning rate in the red line (no weight decay) is reduced by half at the 100<sup>th</sup>, 130<sup>th</sup> and 150<sup>th</sup> epochs. The learning rate of the blue line (with weight decay) is reduced by half at 70<sup>th</sup>, 100<sup>th</sup> and 130<sup>th</sup> epochs. With weight decay (blue graph), despite slow convergence in the early training steps, model accuracy is eventually higher than the red one without weight decay scheme.

Figure 7: Comparison of various hyper-parameter choices for CIFAR-10 or ImageNet.

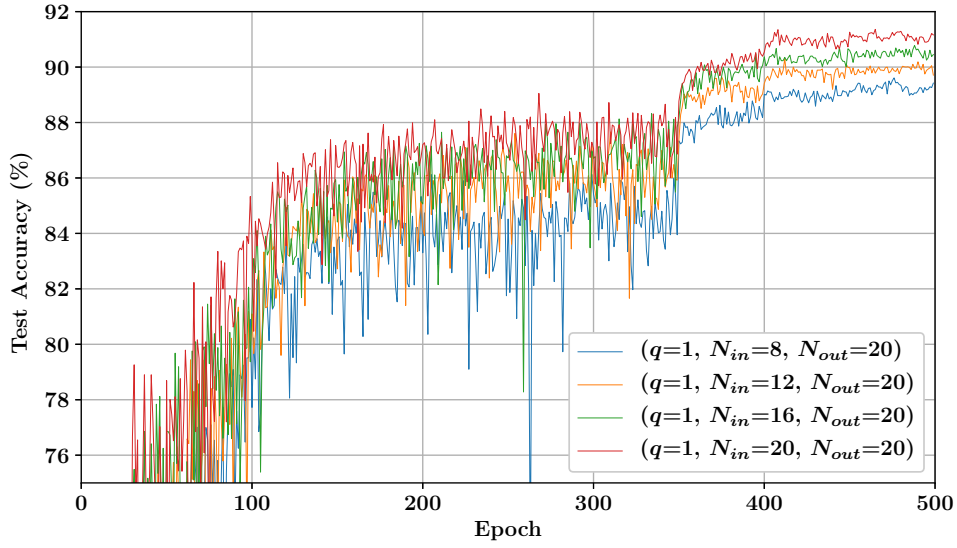

(a) Test accuracy using  $q=1$ .

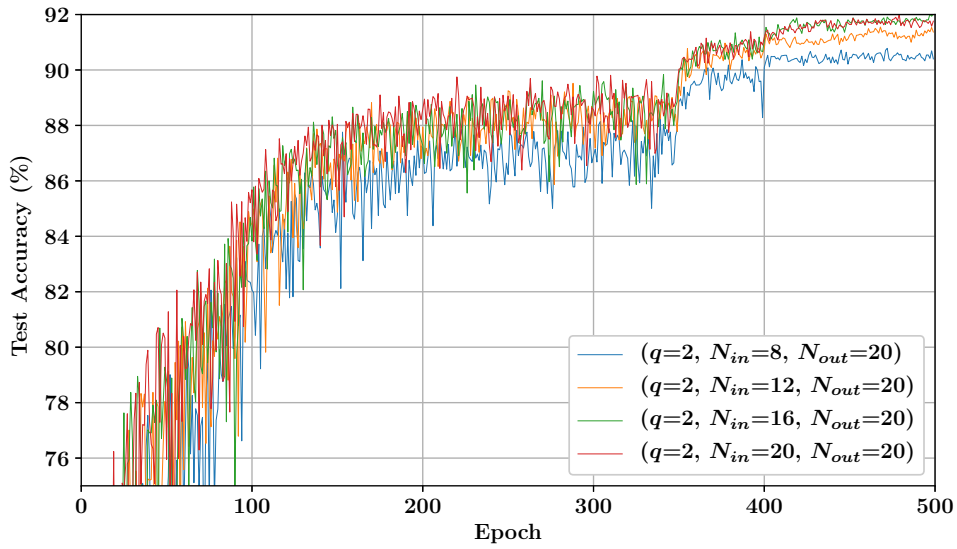

(b) Test accuracy using  $q=2$ . Compared to the above plots (Figure 8a), this figure shows that a combination of multiple  $M^\oplus$  for a binary code can lead to stable learning curves and higher model accuracy.

Figure 8: Test accuracy of ResNet-32 on CIFAR-10 using learning rate warmup (for 100 epochs) and  $N_{out}=20$

## References

- [1] K. He, X. Zhang, S. Ren, and J. Sun. Deep residual learning for image recognition. *2016 IEEE Conference on Computer Vision and Pattern Recognition (CVPR)*, pages 770–778, 2016.
- [2] S. Jung, C. Son, S. Lee, J. Son, J.-J. Han, Y. Kwak, S. J. Hwang, and C. Choi. Learning to quantize deep networks by optimizing quantization intervals with task loss. In *Proceedings of the IEEE Conference on Computer Vision and Pattern Recognition*, pages 4350–4359, 2019.
- [3] F. Li and B. Liu. Ternary weight networks. *arXiv:1605.04711*, 2016.
- [4] X. Lin, C. Zhao, and W. Pan. Towards accurate binary convolutional neural network. In *Advances in Neural Information Processing Systems*, pages 345–353, 2017.
- [5] P. Yin, S. Zhang, J. Lyu, S. Osher, Y. Qi, and J. Xin. Binaryrelax: A relaxation approach for training deep neural networks with quantized weights. *SIAM Journal on Imaging Sciences*, 11(4):2205–2223, 2018.
- [6] D. Zhang, J. Yang, D. Ye, and G. Hua. Lq-nets: Learned quantization for highly accurate and compact deep neural networks. In *Proceedings of the European Conference on Computer Vision (ECCV)*, pages 365–382, 2018.
- [7] C. Zhu, S. Han, H. Mao, and W. J. Dally. Trained ternary quantization. In *International Conference on Learning Representations (ICLR)*, 2017.
